# Supplementary material for: Prevalence and significance of pulmonary disease on lung ultrasonography in outpatients with SARS-CoV-2 infection
Source: HighWire-hosted journal article supplement (doi:10.1136/bmjresp-2021-000947), 2021-08-01
Supplement: bmjresp-2021-000947supp002_data_supplement.pdf [file bmjresp-2021-000947supp002_data_supplement.pdf]

**Supplementary Table 1.** Lung ultrasound severity score components and lung zone distribution.

|                | Left    |                      |               | Right   |                      |               |
|----------------|---------|----------------------|---------------|---------|----------------------|---------------|
|                | B-lines | Pleural Irregularity | Consolidation | B-lines | Pleural Irregularity | Consolidation |
| Posterolateral | 23      | 28                   | 8             | 26      | 31                   | 5             |
| Subscapular    | 34      | 37                   | 13            | 35      | 35                   | 16            |
| Paravertebral  | 29      | 31                   | 12            | 29      | 37                   | 6             |

Severity scores are summed among all participants.
