# Supplementary material for: Prevalence and significance of pulmonary disease on lung ultrasonography in outpatients with SARS-CoV-2 infection
Source: HighWire-hosted journal article supplement (doi:10.1136/bmjresp-2021-000947), 2021-08-01
Supplement: bmjresp-2021-000947supp003_data_supplement.pdf [file bmjresp-2021-000947supp003_data_supplement.pdf]

**Supplementary Table 2.** Baseline characteristics of SARS-CoV-2 infected patients with worsening versus improved lung ultrasound findings at follow-up.

|                                                | <b>Total Cohort<br/>(n = 24)</b> | <b>Worse at<br/>Follow-Up<br/>(n = 9)</b> | <b>Improved at<br/>Follow-Up<br/>(n = 15)</b> | <b>p value</b> |
|------------------------------------------------|----------------------------------|-------------------------------------------|-----------------------------------------------|----------------|
| Age, mean (SD)                                 | 46.4 (14.9)                      | 54.9 (13.3)                               | 41.3 (13.8)                                   | 0.032          |
| Sex, n (%)                                     |                                  |                                           |                                               | 1.000          |
| Female                                         | 18 (75.0)                        | 7 (77.8)                                  | 11 (73.3)                                     |                |
| Male                                           | 6 (25.0)                         | 2 (22.2)                                  | 4 (26.7)                                      |                |
| Race/Ethnicity, n (%)                          |                                  |                                           |                                               | 0.239          |
| Caucasian                                      | 12 (50.0)                        | 5 (55.6)                                  | 7 (46.7)                                      |                |
| African American                               | 1 (4.2)                          | 1 (11.1)                                  | 0 (0.0)                                       |                |
| Asian/Pacific Islander                         | 1 (4.2)                          | 0 (0.0)                                   | 1 (6.7)                                       |                |
| Hispanic                                       | 7 (29.2)                         | 1 (11.1)                                  | 6 (40.0)                                      |                |
| Other                                          | 3 (12.5)                         | 2 (22.2)                                  | 1 (6.7)                                       |                |
| Current or Prior Smoker, n (%)                 | 6 (25.0)                         | 2 (22.2)                                  | 4 (26.7)                                      | 1.000          |
| BMI, mean (SD)                                 | 24.7 (4.0)                       | 24.7 (3.4)                                | 24.6 (4.5)                                    | 0.953          |
| Baseline Max LUS Score, mean (SD)              | 5.96 (3.68)                      | 6.44 (3.78)                               | 5.67 (3.72)                                   | 0.607          |
| Baseline B-Line Score, mean (SD)               | 5.00 (3.41)                      | 5.22 (3.70)                               | 4.87 (3.36)                                   | 0.854          |
| Baseline Pleural Irregularity Score, mean (SD) | 5.42 (3.57)                      | 5.89 (3.98)                               | 5.13 (3.42)                                   | 0.650          |
| Baseline Consolidation Score, mean (SD)        | 2.79 (3.06)                      | 2.44 (2.55)                               | 3.00 (3.40)                                   | 0.854          |
| Baseline Symptom, n (%)                        |                                  |                                           |                                               |                |
| Fever                                          | 10 (41.7)                        | 4 (44.4)                                  | 6 (40.0)                                      | 1.000          |
| Cough                                          | 16 (66.7)                        | 7 (77.8)                                  | 9 (60.0)                                      | 0.657          |
| Shortness of Breath                            | 10 (41.7)                        | 3 (33.3)                                  | 7 (46.7)                                      | 0.678          |

SARS-CoV-2 = severe acute respiratory syndrome coronavirus-2; SD = standard deviation; BMI = body mass index; LUS = lung ultrasound.
