# Supplementary figures and images for: Prevalence and significance of pulmonary disease on lung ultrasonography in outpatients with SARS-CoV-2 infection
Source: HighWire-hosted journal article supplement (doi:10.1136/bmjresp-2021-000947), 2021-08-01

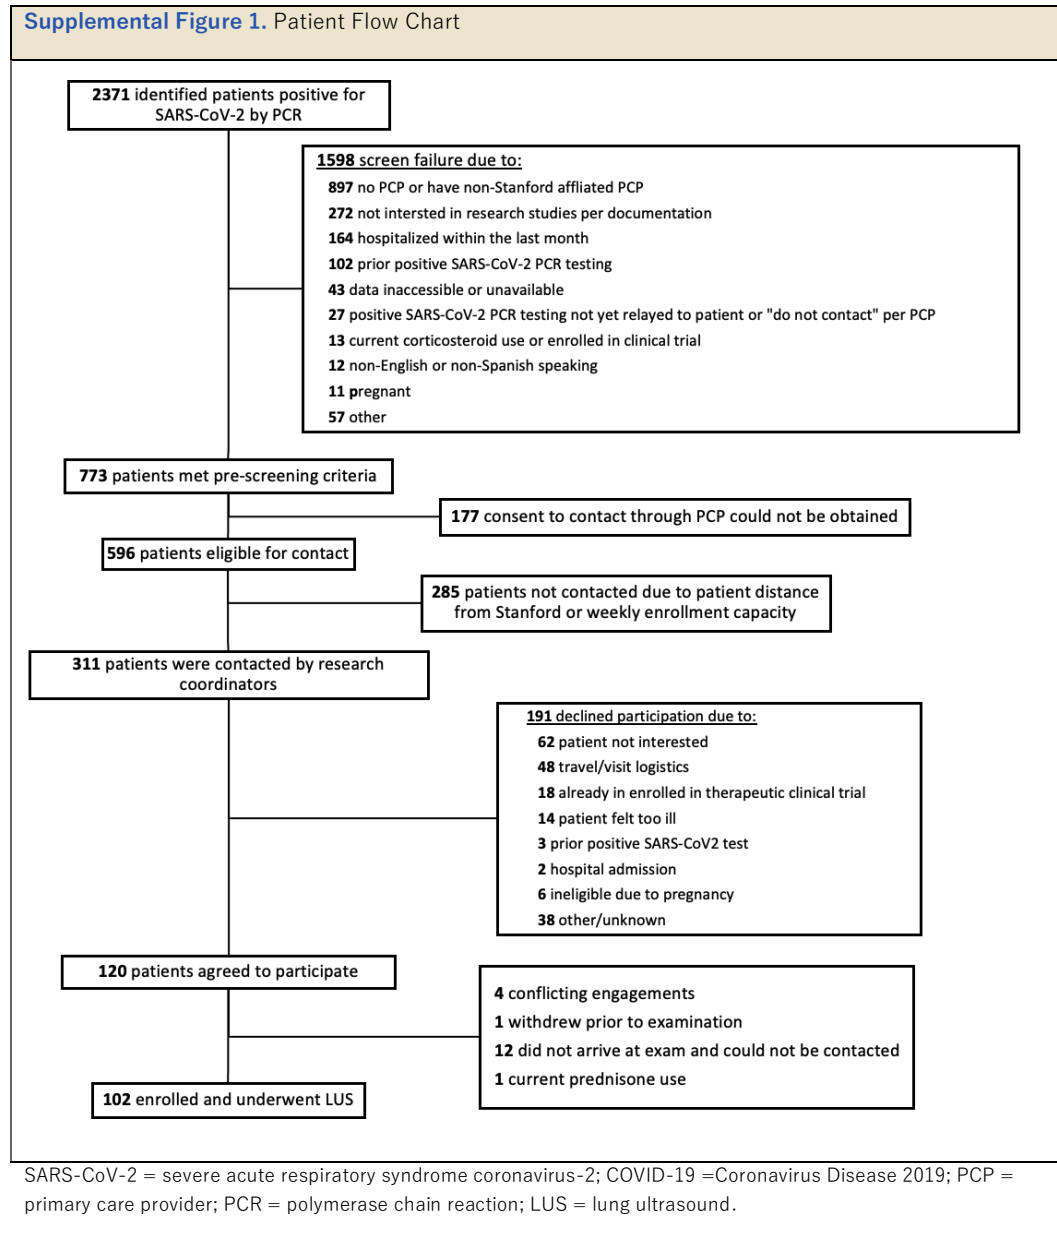

Supplement: bmjresp-2021-000947supp001_data_supplement.pdf [file bmjresp-2021-000947supp001_data_supplement.pdf]
